# Supplementary material
Source: PubMed Central journal article supplement (PMC3936592)
Supplement: supp_mct301_mct301supp.pdf [file supp_mct301_mct301supp.pdf]

## SUPPLEMENTARY DATA

Table 1. Primers used for gene isolation, expression in *Epimedium*, qPCR of flowering time genes in arabidopsis, yeast two-hybrid and yeast three-hybrid.

| Genes/primer name   | Sequences (5' to 3')                                                                    | Usage                                                |
|---------------------|-----------------------------------------------------------------------------------------|------------------------------------------------------|
| 3'CDS               | AAGCAGTGGTATCAACGCAGAGTAC(T)30N-1N                                                      | First strand synthesis for 3'RACE                    |
| 5'CDS               | (T)25VN-3'                                                                              | First strand synthesis for 5'RACE                    |
| SMARTII             | AAGCAGTGGTATCAACGCAGAGTACGCGGG                                                          | RACE                                                 |
| UPML                | F:CTAATACGACTCACTATAGGGCAAGCAGTGGTATCAACGCAGAGT                                         | 5'RACE for first round                               |
| UPMS                | F:CTAATACGACTCACTATAGGGC                                                                | 5'RACE for second round                              |
| NUP                 | AAGCAGTGGTATCAACGCAGAGT                                                                 | 5'RACE for second round                              |
| <i>EsFUL</i> -like  | F: CAGTGGGATCAGCAAATCA<br>R: AGGAGGCATCAGGGAGGTAT                                       | qPCR<br>qPCR                                         |
| <i>EsAGL2-1</i>     | F: TGCCAGAACTCTCAACCAGA<br>R: CATCCATCCAGGAATGAAGC                                      | qPCR<br>qPCR                                         |
| <i>EsAGL2-2</i>     | F: CATCGACCATTCTGGGAAAC<br>R: CGCAAGTTTGAATTGCATTG                                      | qPCR<br>qPCR                                         |
| <i>EsAGL6</i> -Like | F: AGCTTGAGCCTGAAGGACAG<br>R: TGGTCAGGGCAAGGAGAAGT                                      | qPCR<br>qPCR                                         |
| <i>EsACTIN</i>      | F: GCCATTCAAGGCTGTCTTTTC<br>R: GGTAAGATCGCGACCTGCTA                                     | qPCR<br>qPCR                                         |
| <i>FUL</i> -like    | F: CTSAAGAARGCKCAYGAGATC<br>F: GAGATCTCYGTSCTCTGYGAYG                                   | 3' RACE one round<br>3' RACE one round               |
| <i>EsAGL2-1/2-2</i> | F:GAGAACAARATHAACAGGCARG<br>F:AGGTTGCTCTMATMATYTTTC                                     | 3' RACE one round<br>3'RACE second round             |
| <i>EsAGL2-1</i>     | R:TTGCGTTAGCTTCTTTTCAGCATTGTTCCTTTTG<br>R:TGTCCGGGGCGTTTGTCTCCAAGGAT                    | 5' RACE one round<br>5'RACE second round             |
| <i>EsAGL2-2</i>     | R:AAGTGCACCTTTGATACCTCTCCAATGTCTTGT<br>R:AGCATACTCGAAGAGCTTTCTTTGGTTGAGAA               | 5' RACE one round<br>5'RACE second round             |
| <i>EsAGL6</i>       | F:ATGGGDAGAGGRAGAGTDGAGYT<br>R: GGAAGGAGTTGGCTTGACTAATGC<br>R: GCTCTTTGAGGGGTGTAACAGCAA | 3' RACE<br>5' RACE one round<br>5' RACE second round |
| <i>EsFUL</i>        | F: ATGGGGAGAGGTAGGGTTCAAC<br>R: TTATTCAATCAGGAGGATGACGAAGCAT                            | Full-length primer<br>Full-length primer             |
| <i>CO</i>           | F: TGCAAACCCACTTGCT<br>R: CCTCCTTGGCATCCTTATCA                                          | qRT-PCR<br>qRT-PCR                                   |
| <i>FT</i>           | F: GGAACAACCTTTGGCAAT<br>R:AGCCACTCTCCCTCTGACAA                                         | qRT-PCR<br>qRT-PCR                                   |
| <i>AP1</i>          | F: GCAAGCAATGAGCCCTAAAG<br>R:ACTGCTCCTGTTGAGCCCTA                                       | qRT-PCR<br>qRT-PCR                                   |
| <i>LFY</i>          | F: ATTGGTTCAAGCACCACTC<br>R:CAAGAAGCTCCAACGAAAG                                         | qRT-PCR<br>qRT-PCR                                   |

---

|                  |                                  |         |
|------------------|----------------------------------|---------|
| <i>FLC</i>       | F: AGCCAAGAAGACCGAACTCA          | qRT-PCR |
|                  | R:TTTGTCCAGCAGGTGACATC           | qRT-PCR |
| <i>SOC1</i>      | F: AATTCGCCAGCTCCAATATG          | qRT-PCR |
|                  | R:CCTCGATTGAGCATGTTCTCT          | qRT-PCR |
| <i>TUB</i>       | F: TGGCATCAACTTTCATTGGA          | qRT-PCR |
|                  | R:ATGTTGCTCTCCGCTTCTGT           | qRT-PCR |
| FULEcoRI         | F:CCGGAATTCATGGGGAGAGGTAGGGTTCA  | Y2H     |
| FULBamHI         | R:TTATTCATTCACATGACGAAGCA        | Y2H     |
| AGL2-1EcoRI      | F:CCGGAATTCATGGGAAGAGGAAGAG      | Y2H     |
| AGL2-1BamHI      | R:CGGGATCCTAGGTGATGAGTTAGAAC     | Y2H     |
| AGL6NdeI         | F:GGAATTCATATGGGGAGAGGGAGAGTG    | Y2H     |
| AGL6BamHI        | R:CGCGGATCCTCAAAGGACCCATCCTTGGA  | Y2H     |
| AGL2-2NdeI       | F: GGAATTCATATGGGGAGGGGGAGAGTGG  | Y2H     |
| AGL2-2SEP1       | R:CGGGATCCTTATTCCTCTGTTTGAGTCT   | Y2H     |
| AGL2-2SEP2       | R:CGGGATCCTTATGCTGCAACTTGAT      | Y2H     |
| AGyeastF         | F: CCGGAATTCATGGGAAGAGGAAGA      | Y2H     |
| AGyeastR         | R: CGGGATCCTGTCAAGCATATCATCCGA   | Y2H     |
| AG11yeastF       | F: GGAATTCATATGCCTGCAGGTCG       | Y2H     |
| AG11yeastR       | R: CCGGAATTCCTATCCAAGGTGGAG      | Y2H     |
| AP3-1(IKC)yeastF | F: CCGGAATTCAGAGTCCTTCCCTCACG    | Y2H     |
| AP3-1(IKC)yeastR | R: CGCGGATCCAACCTCTATTAGGCAAGA   | Y2H     |
| AP3-2(IKC)yeastF | F: CCGGAATTCGTTAGTCCCGGACA       | Y2H     |
| AP3-2(IKC)yeastR | R: CGCGGATCCTATATTTAACTTGATAAC   | Y2H     |
| AP3-3(IKC)yeastF | F: CCGGAATTCATCAGTCCTTATAACG     | Y2H     |
| AP3-3(IKC)yeastR | R: CGCGGATCCACCAAGTTGTAAATTGA    | Y2H     |
| PI(IKC)yeastF    | F: CCGGAATTCGTAGCCCTTCCACCACG    | Y2H     |
| PI(IKC)yeastR    | R: CGCGGATCCAGTAAGTTTTGGCAGCTTTC | Y2H     |
| AP3-2(IKC)pTFT   | F: CCGGAATTCGTTAGTCCCGGACA       | Y3H     |
| AP3-2(IKC)pTFT   | R: CGCGGATCCTATATTTAACTTGATAAC   | Y3H     |

---

Table 2. Sequences for AP1, SEP and AGL6 phylogeny reconstruction

| Family          | Species                         | Accession No             | Name                | Type            |
|-----------------|---------------------------------|--------------------------|---------------------|-----------------|
| Magnoliaceae    | <i>Magnolia grandiflora</i>     | AY821777 (NCBI)          | Magnolia_g_FUL      | FUL-like        |
| Brassicaceae    | <i>Arabidopsis thaliana</i>     | NM_105581 (NCBI)         | Arabidopsis_t_AP1   | euAP1           |
|                 |                                 | NM_102395 (NCBI)         | Arabidopsis_t_CAL   | euAP1           |
|                 |                                 | NM_125484 (NCBI)         | Arabidopsis_t_FUL   | FUL-like        |
|                 |                                 | NM_113925 (NCBI)         | Arabidopsis_t_AGL79 | AGL79           |
| Caricaceae      | <i>Carica papaya</i>            | evm.TU.supercontig_1.158 | Carica_p_AP1        | euAP1           |
| Rosaceae        | <i>Fragaria vesca</i>           | gene26119                | Fragaria_v_AP1      | euAP1           |
|                 |                                 | gene04228                | Fragaria_v_AGL79    | AGL79           |
|                 |                                 | gene04562                | Fragaria_v_FUL      | euFUL           |
| Vitaceae        | <i>Vitis vinifera</i>           | GSVIVT01012250001        | Vitis_v_AP1         | euAP1           |
|                 |                                 | GSVIVT01036549001        | Vitis_v_AGL79       | AGL79           |
|                 |                                 | GSVIVT01008140001        | Vitis_v_FUL         | euFUL           |
| Solanaceae      | <i>Solanum lycopersicum</i>     | AF448521 (NCBI)          | Solanum_l_MC        | euAP1           |
|                 |                                 | TC162618 (TIGR)          | Solanum_l_leFUL     | euFUL           |
|                 |                                 | BT013126 (TIGR)          | Solanum_l_SLMBP20   | AGL79           |
|                 |                                 | NM_001247614 (NCBI)      | Solanum_l_TDR4      | euFUL           |
| Rosaceae        | <i>Prunus persica</i>           | PPA010723M               | Prunus_p_AP1        | euAP1           |
|                 |                                 | PPA010249M               | Prunus_p_AGL79      | AGL79           |
|                 |                                 | PPA010308M               | Prunus_p_FUL        | euFUL           |
| Berberidaceae   | <i>Dysosma pleiantha</i>        | JN593333 (NCBI)          | Dysosma_p_FUL       | FUL-like        |
|                 | <i>Nandina domestica</i>        | JN593334 (NCBI)          | Nandina_d_FUL       | FUL-like        |
|                 | <i>Mahonia bealei</i>           | JN593335 (NCBI)          | Mahonia_b_FUL       | FUL-like        |
|                 | <i>Epimedium sagittatum</i>     | JN590216 (NCBI)          | Epimedium_s_FUL     | FUL-like        |
| Ranunculaceae   | <i>Aquilegia coerulea</i>       | JX680252 (NCBI)          | Aquilegia_c_FUL1A   | FUL-like        |
|                 |                                 | JX680253 (NCBI)          | Aquilegia_c_FUL1B   | FUL-like        |
| Papaveraceae    | <i>Eschscholzia californica</i> | HM592297 (NCBI)          | Eschscholzia_c_FUL1 | FUL-like        |
|                 |                                 | HM592298 (NCBI)          | Eschscholzia_c_FUL2 | FUL-like        |
| Lardizabalaceae | <i>Akebia trifoliata</i>        | AY627632 (NCBI)          | Akebia_t_FUL1       | FUL-like        |
|                 |                                 | GU357459 (NCBI)          | Akebia_t_FUL2       | FUL-like        |
| Lardizabalaceae | <i>Decaisnea insignis</i>       | DQ656556 (NCBI)          | Decaisnea_i_FUL1    | FUL-like        |
|                 |                                 | DQ656557 (NCBI)          | Decaisnea_i_FUL2    | FUL-like        |
| Amborellaceae   | <i>Amborella trichopoda</i>     | AY850179 (NCBI)          | Amborella_t_AGL2    | AGL2/3/4        |
| Nymphaeaceae    | <i>Nuphar advena</i>            | AY850183 (NCBI)          | Nuphar_a_AGL2       | AGL2/3/4        |
| Magnoliaceae    | <i>Magnolia grandiflora</i>     | AY821781 (NCBI)          | Magnolia_g_AGL2     | AGL2/3/4        |
|                 |                                 | AY551922 (NCBI)          | Oryza_s_RMADS217    | AGL2/3/4        |
|                 |                                 | U78890 (NCBI)            | Oryza_s_OsMADS5     | AGL2/3/4        |
| Papaveraceae    | <i>Eschscholzia californica</i> | AY850181 (NCBI)          | Eschscholzia_c_AGL2 | AGL2/3/4        |
| Berberidaceae   | <i>Epimedium sagittatum</i>     | JN590218 (NCBI)          | Epimedium_s_AGL2-1  | AGL2/3/4        |
|                 |                                 | JN590219 (NCBI)          | Epimedium_s_AGL2-2  | AGL2/3/4        |
|                 | <i>Aquilegia coerulea</i>       | JX680244 (NCBI)          | Aquilegia_c_SEP1    | AGL2/3/4        |
|                 |                                 | JX680245 (NCBI)          | Aquilegia_c_SEP2A   | AGL2/3/4        |
|                 | <i>Eschscholzia californica</i> | AY850181                 | Eschscholzia_c_AGL2 | AGL2/3/4        |
|                 | Lardizabalaceae                 | <i>Akebia trifoliata</i> | GU357447 (NCBI)     | Akebia_t_SEP1_1 |

|               |                                                    |                           |                     |           |
|---------------|----------------------------------------------------|---------------------------|---------------------|-----------|
|               |                                                    | GU357488 (NCBI)           | Akebia_t_SEP1_2     | AGL2/3/4  |
| Caricaceae    | <i>Carica papaya</i>                               | evm.TU.supercontig_14.225 | Carica_p_FBP9       | FBP9      |
|               |                                                    | evm.TU.supercontig_660.1  | Carica_p_SEP1       | AGL3      |
| Solanaceae    | <i>Solanum lycopersicum</i>                        | SOLYC02G089200.2          | Solanum_l_TM29      | AGL2      |
|               |                                                    | SOLYC03G114840.2          | Solanum_MADS1       | FBP9      |
|               |                                                    | NM_001247741 (NCBI)       | Solanum_l_RIN       | FBP9      |
| Rosaceae      | <i>Fragaria vesca</i>                              | gene04563                 | Fragaria_v_AGL3     | AGL3      |
|               |                                                    | gene04229                 | Fragaria_v_AGL2     | AGL2      |
|               |                                                    | gene26118                 | Fragaria_v_FBP9     | FBP9      |
| Vitaceae      | <i>Vitis vinifera</i>                              | GSVIVT01012249001         | Vitis_v_AGL3        | AGL3      |
|               |                                                    | GSVIVT01036551001         | Vitis_v_AGL2        | AGL2      |
|               |                                                    | GSVIVT01008139001         | Vitis_v_FBP9        | FBP9      |
| Rosaceae      | <i>Prunus persica</i>                              | ppa1027139m               | Prunus_p_AGL3       | AGL3      |
|               |                                                    | ppa010577m                | Prunus_p_AGL2       | AGL2      |
|               |                                                    | ppa010391m                | Prunus_p_FBP9       | FBP9      |
| Gnetaceae     | <i>Gnetum parvifolium</i>                          | AB022665 (NCBI)           | Gnetum_p_MAD3       | AGL6-like |
| Poaceae       | <i>Oryza sativa</i>                                | AF109153 (NCBI)           | Oryza_s_MADS17      | AGL6-like |
|               |                                                    | OSU78782 (NCBI)           | Oryza_s_MADS6       | AGL6-like |
| Magoliaceae   | <i>Magnolia<br/>praecocissima</i>                  | AB050645 (NCBI)           | Magolia_p_AGL3      | AGL6-like |
|               |                                                    | AB050646 (NCBI)           | Magolia_p_AGL4      | AGL6-like |
| Ranunculaceae | <i>Ranunculus bulbosus</i>                         | AY306184 (NCBI)           | Ranunculus_b_AGL6   | AGL6-like |
|               | <i>Aquilegia coerulea</i>                          | JX680248 (NCBI)           | Aquilegia_c_AGL6    | AGL6-like |
| Berberidaceae | <i>Epimedium sagittatum</i>                        | JN590217 (NCBI)           | Epimedium_s_AGL6    | AGL6-like |
| Vitaceae      | <i>Vitis vinifera</i>                              | AF373602 (NCBI)           | Vitis_v_MADS3       | euAGL6    |
|               |                                                    | EC990748 (NCBI)           | Vitis_v_AGL6a       | AGL6-like |
| Rosaceae      | <i>Malus domestica</i>                             | AJ000763 (NCBI)           | Malus_d_MADS11      | euAGL6    |
| Fabaceae      | <i>Pisum sativum</i>                               | AY884289 (NCBI)           | Pisum_s_AGL6        | euAGL6    |
| Rutaceae      | <i>Citrus reticulata</i> x<br><i>Citrus temple</i> | DN795437                  | Citrus_r_AGL6       | AGL6-like |
| Diapensiaceae | <i>Galax urceolata</i>                             | M55554                    | Galax_u_AGL6        | euAGL6    |
| Actinidiaceae | <i>Actinidia chinensis</i>                         | HM121974 (NCBI)           | Actinidia_c_AGL6a   | AGL6-like |
| Brassicaceae  | <i>Arabidopsis thaliana</i>                        | M55554 (NCBI)             | Arabidopsis_t_AGL6  | euAGL6    |
|               |                                                    | NM_115976.1 (NCBI)        | Arabidopsis_t_AGL13 | euAGL6    |
| Caricaceae    | <i>Carica papaya</i>                               | EU659992 (NCBI)           | Carica_p_MADS3      | euAGL6    |
| Malvaceae     | <i>Gossypium hirsutum</i>                          | FJ409870 (NCBI)           | Cossypium_h_MADS13  | euAGL6    |
